# Supplementary material for: Hydrophobic CPP/HDO conjugates: a new frontier in oligonucleotide-warheaded PROTAC delivery
Source: Royal Society of Chemistry journal article supplement (doi:10.1039/d4md00546e), 2024-01-01
Supplement: d4md00546e1.pdf [file d4md00546e1.pdf]

## Supporting Information

### Hydrophobic CPP/HDO Conjugates: A New Frontier in Oligonucleotide- Warheaded PROTAC Delivery

Miyako Naganuma,<sup>†,‡</sup> Nobumichi Ohoka,<sup>§,\*</sup> Motoharu Hirano,<sup>†,‡</sup> Daishi Watanabe,<sup>†,‡</sup>  
Genichiro Tsuji,<sup>†</sup> Takao Inoue,<sup>§</sup> and Yosuke Demizu<sup>†,‡,||,\*</sup>

<sup>†</sup>Division of Organic Chemistry, National Institute of Health Sciences, Kanagawa, Japan

<sup>‡</sup>Graduate School of Medical Life Science, Yokohama City University, Kanagawa,  
Japan

<sup>§</sup>Division of Molecular Target and Gene Therapy Products, National Institute of Health  
Sciences, Kanagawa, Japan

<sup>||</sup>Graduate School of Medicine, Dentistry and Pharmaceutical Sciences, Division of  
Pharmaceutical Science of Okayama University, Japan

Corresponding author:

Tel: +81-44-270-6578, Fax: +81-44-270-6578, E-mail: demizu@nihs.go.jp (Y. Demizu)

Tel: +81-44-270-6537, Fax: +81-44-270-6539, E-mail: n-ohoka@nihs.go.jp (N. Ohoka)

## Table of Contents

|                                                                                |     |
|--------------------------------------------------------------------------------|-----|
| • Characterization of chimeric decoys ( <b>Figure S1</b> and <b>Table S1</b> ) | S3  |
| • HPLC and UPLC analysis of decoys ( <b>Figure S2</b> )                        | S5  |
| • MALDI TOF MS spectrum ( <b>Figure S3</b> )                                   | S8  |
| • ESI TOF MS spectrum ( <b>Figure S4</b> )                                     | S9  |
| • Binding assay of chimeric decoys ( <b>Figure S5</b> )                        | S10 |
| • Western Blotting ( <b>Figure S6</b> )                                        | S11 |
| • Cell proliferation assay ( <b>Figure S7</b> and <b>S8</b> )                  | S12 |

---

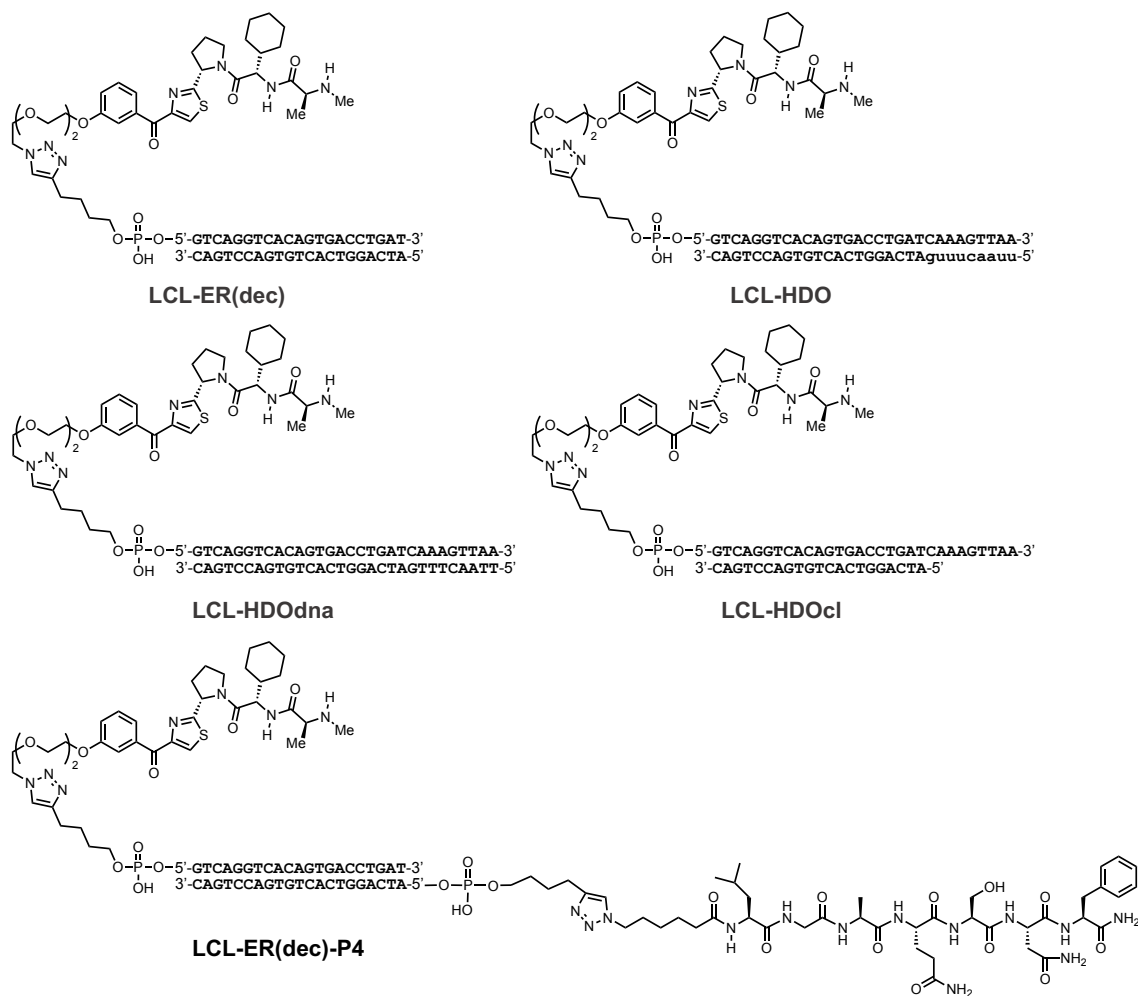

**Figure S1.** Molecules synthesized in this study.

**Table S1.** Sequence of decoys and peptide used in this study.

|    | <b>Compounds</b>      | <b>Sequence</b>                                                                                                                                                   |
|----|-----------------------|-------------------------------------------------------------------------------------------------------------------------------------------------------------------|
| 1  | <b>LCL-ER(dec)</b>    | Forward ( <b>LCL-ER(dec)-F</b> ): 5'- <b>LCL</b> -GTCAGGTCACAGTGACCTGAT-3'<br>Reverse ( <b>ER(dec)-R</b> ): 3'-CAGTCCAGTGTCACTGGACTA-5'                           |
| 2  | <b>LCL-HDO</b>        | Forward ( <b>LCL-HDO-F</b> ): 5'- <b>LCL</b> -GTCAGGTCACAGTGACCTGATCAAAGTTAA-3'<br>Reverse ( <b>HDO-R</b> ): 3'-CAGTCCAGTGTCACTGGACTAguuucauu-5'                  |
| 3  | <b>LCL-HDOdna</b>     | Forward ( <b>LCL-HDO-F</b> ): 5'- <b>LCL</b> -GTCAGGTCACAGTGACCTGATCAAAGTTAA-3'<br>Reverse ( <b>HDOdna-R</b> ): 3'-CAGTCCAGTGTCACTGGACTAGTTTCAATT-5'              |
| 4  | <b>LCL-HDOcl</b>      | Forward ( <b>LCL-HDO-F</b> ): 5'- <b>LCL</b> -GTCAGGTCACAGTGACCTGATCAAAGTTAA-3'<br>Reverse ( <b>ER(dec)-R</b> ): 3'-CAGTCCAGTGTCACTGGACTA-5'                      |
| 5  | <b>CPP/HDO-PROTAC</b> | Forward ( <b>LCL-HDO-F</b> ): 5'- <b>LCL</b> -GTCAGGTCACAGTGACCTGATCAAAGTTAA-3'<br>Reverse ( <b>P4-HDO-R</b> ): 3'-CAGTCCAGTGTCACTGGACTAguuucauu-5'- <b>P4</b>    |
| 6  | <b>FP-probe</b>       | Forward ( <b>5'-FAM-ER(dec)-F</b> ): 5'- <b>FAM</b> -GTCAGGTCACAGTGACCTGAT-3'<br>Reverse ( <b>5'-FAM-ER(dec)-R</b> ): 3'-CAGTCCAGTGTCACTGGACTA- <b>FAM</b> -5'    |
| 7  | <b>FAM-ER(dec)</b>    | Forward ( <b>5'-FAM-ER(dec)-F</b> ): 5'- <b>FAM</b> -GTCAGGTCACAGTGACCTGAT-3'<br>Reverse ( <b>ER(dec)-R</b> ): 3'-CAGTCCAGTGTCACTGGACTA-5'                        |
| 8  | <b>FAM-HDOdna</b>     | Forward ( <b>5'-FAM-HDO-F</b> ): 5'- <b>FAM</b> -GTCAGGTCACAGTGACCTGATCAAAGTTAA-3'<br>Reverse ( <b>HDOdna-R</b> ): 3'- CAGTCCAGTGTCACTGGACTAGTTTCAATT-5'          |
| 9  | <b>FAM-HDO-P4</b>     | Forward ( <b>5'-FAM-HDO-F</b> ): 5'- <b>FAM</b> -GTCAGGTCACAGTGACCTGATCAAAGTTAA-3'<br>Reverse ( <b>P4-HDO-R</b> ): 3'-CAGTCCAGTGTCACTGGACTAguuucauu-5'- <b>P4</b> |
| 10 | <b>LCL-ER(dec)-P4</b> | Forward ( <b>LCL-ER(dec)-F</b> ): 5'- <b>LCL</b> -GTCAGGTCACAGTGACCTGAT-3'<br>Reverse ( <b>P4-ER(dec)-R</b> ): 3'-CAGTCCAGTGTCACTGGACTA-5'- <b>P4</b>             |

LCL: LCL161, lowercase : RNA, **FAM**: fluorescein, P4: N<sub>3</sub>-C6-LGAQSNF-NH<sub>2</sub>

## HPLC analysis of decoys

HPLC conditions

Column : CAPCELL PAK MG-II (C18, 4.6 x 250 mm, 5  $\mu$ m; OSAKA soda).

Mobile phase : A = 0.1 M triethylammonium acetate (TEAA) buffer (pH7.0), B = CH<sub>3</sub>CN.

Gradient : B% = 10-40 over 20 min, 40-100 over 5 min.

Flow rate : 1.0 mL/min.

Column temperature : 35°C.

Detection : 260 nm.

### LCL-HDO-F purity 99%

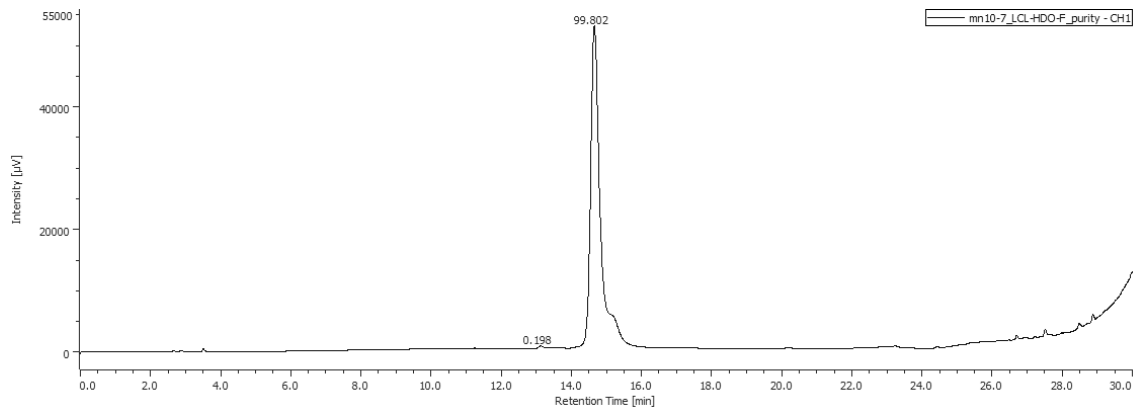

### P4-HDO-R purity 97%

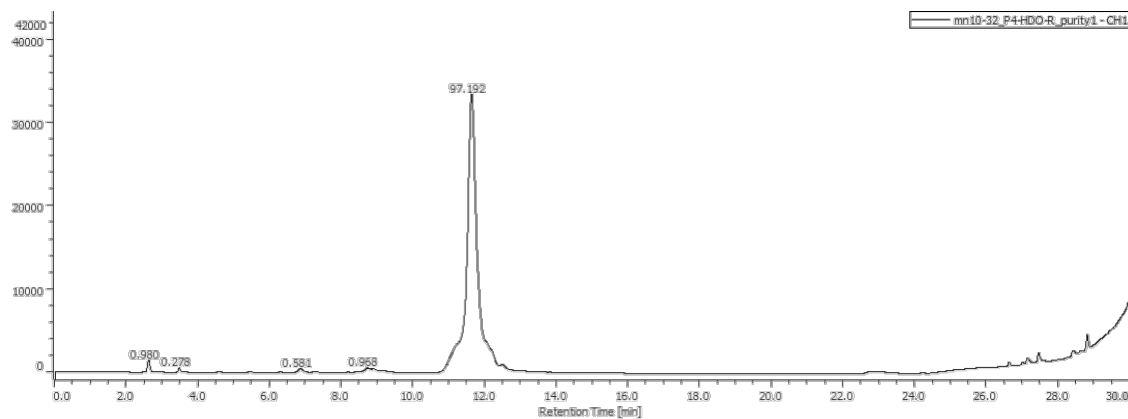

**FAM-HDO-F purity 90%**

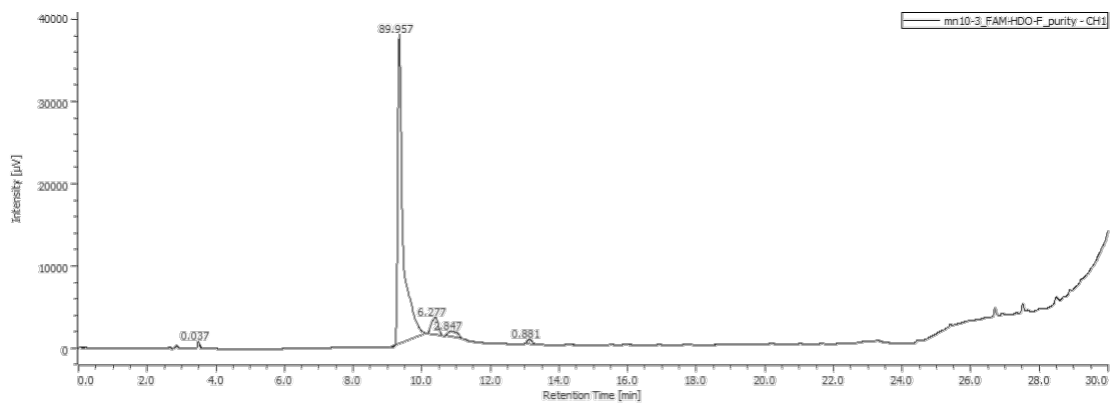

**LCL-ER(dec)-F purity 98%**

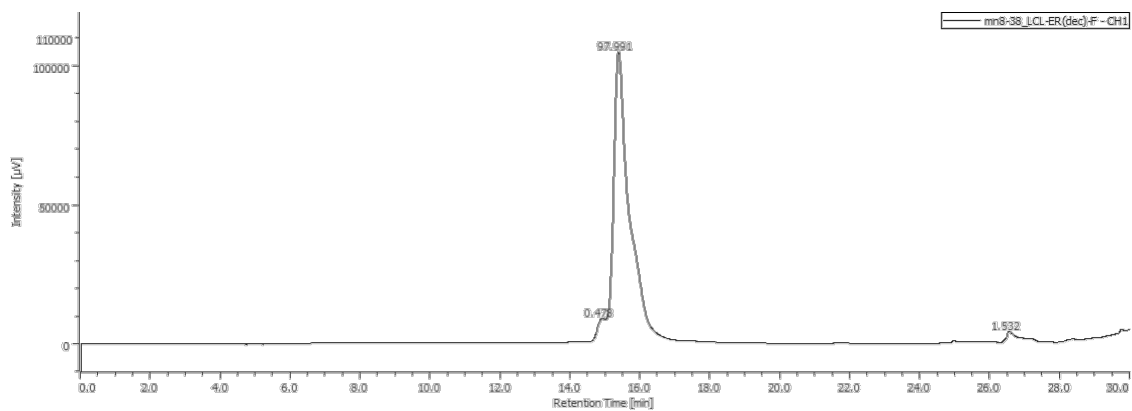

**FAM-ER(dec)-F purity 99%**

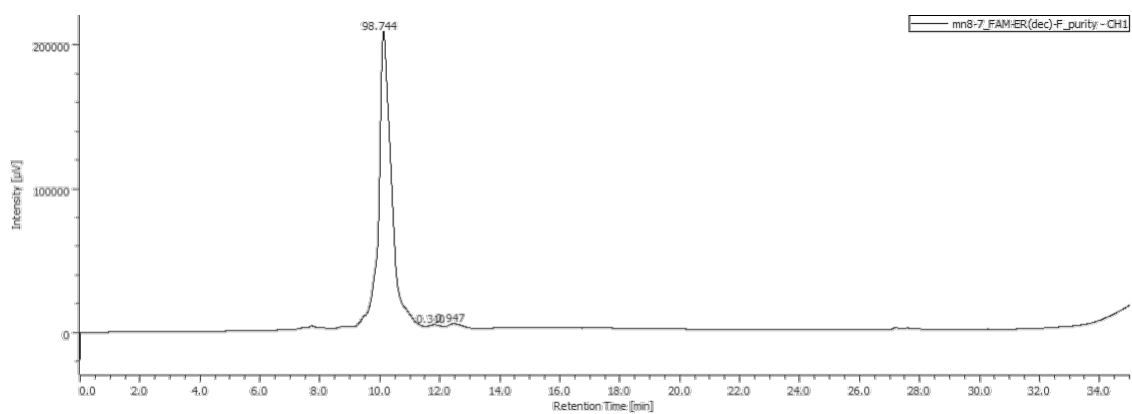

### FAM-ER(dec)-R purity 99%

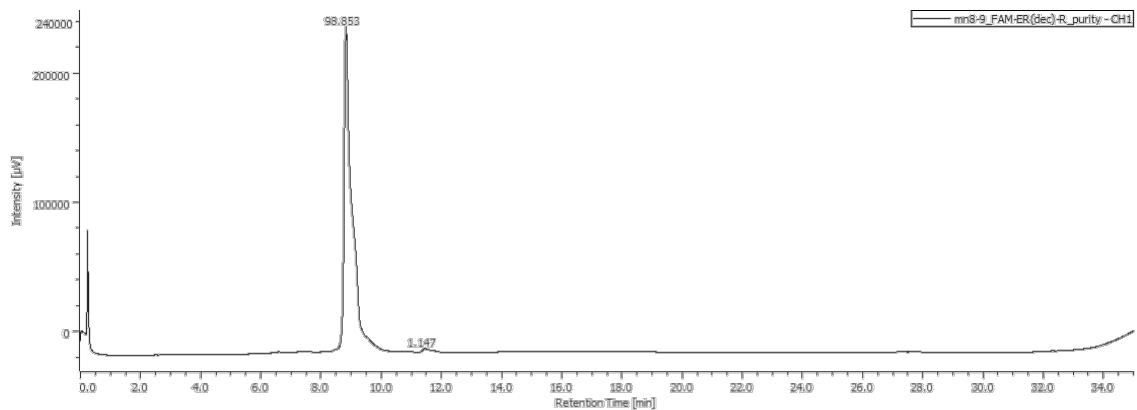

### UPLC analysis of peptide

UPLC conditions

Column : ACQUITY UPLC® BEH C18 1.7  $\mu$ m column (2.1  $\times$  50 mm)

Mobile phase : A = 0.1% TFA/water, solvent, B: 0.1% TFA/CH<sub>3</sub>CN gradient: 10-90% gradient of solvent B over 4 min).

flow rate: 0.5 mL/min

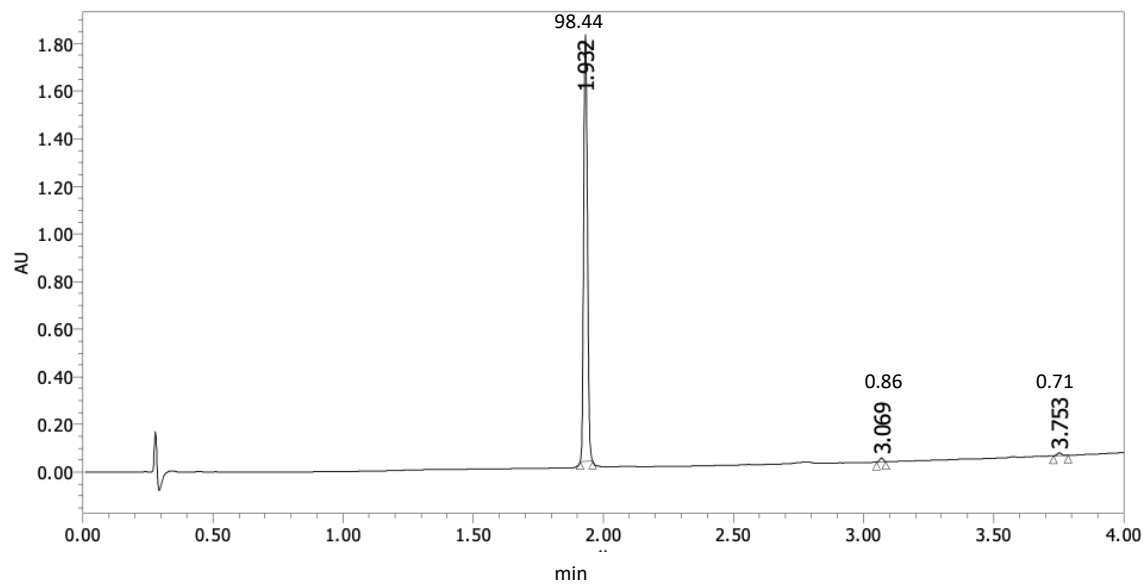

**Figure S2.** HPLC trace of the synthesized decoys, peptide and chimeric molecules.







## Fluorescence polarization assay

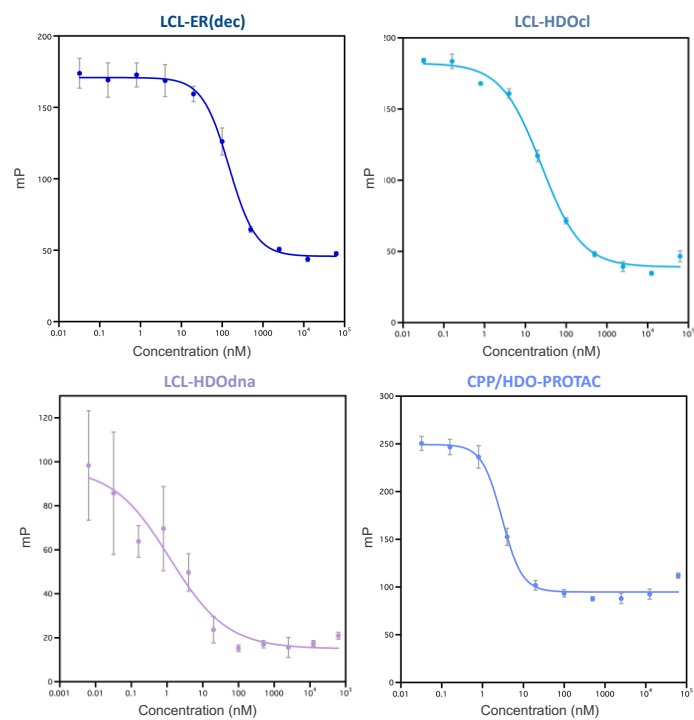

**Figure S5.** The competitive binding assay of **LCL-ER(dec)**, **LCL-HDOcl**, **LCL-HDOdna** and **CPP-HDO-PROTAC** to the ER $\alpha$ . Condition: 62.5  $\mu$ M-0.032 nM decoy in TE buffer (pH 7.5) containing 25 mM NaCl, measured at 25°C. The data represent means S.D. (n = 3).

## Biology

### Western blotting

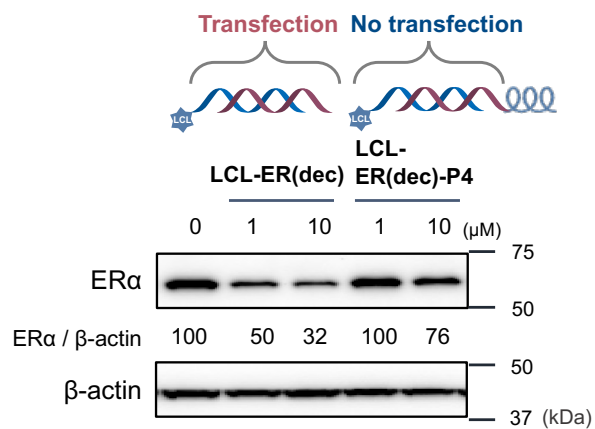

**Figure S6.** Degradation of ER $\alpha$  by LCL-ER(dec) and LCL-ER(dec)-P4. MCF-7 cells were treated (for 24 h) with the indicated concentrations of LCL-ER(dec) and LCL-ER(dec)-P4.

## Cell proliferation assay

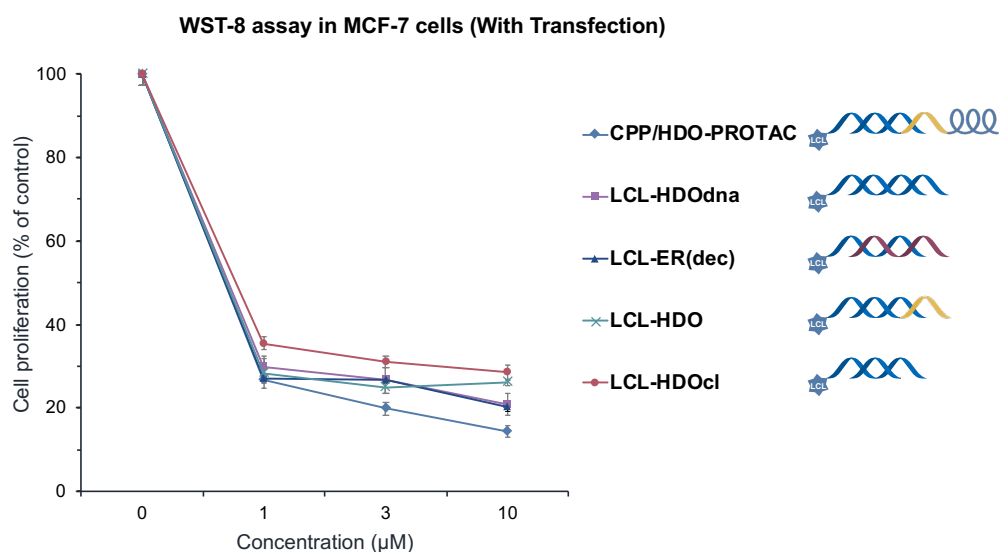

**Figure S7.** Effects of PROTACs on the proliferation of ER $\alpha$ -positive breast cancer cells. Growth inhibition of ER $\alpha$ -positive breast cancer cells by PROTACs. MCF-7 cells were transfected with 1–10  $\mu$ M of the indicated PROTACs for 72 h, and cell proliferation was then evaluated using a cell viability assay. Data represent the mean  $\pm$  standard deviation ( $n = 5$ ).

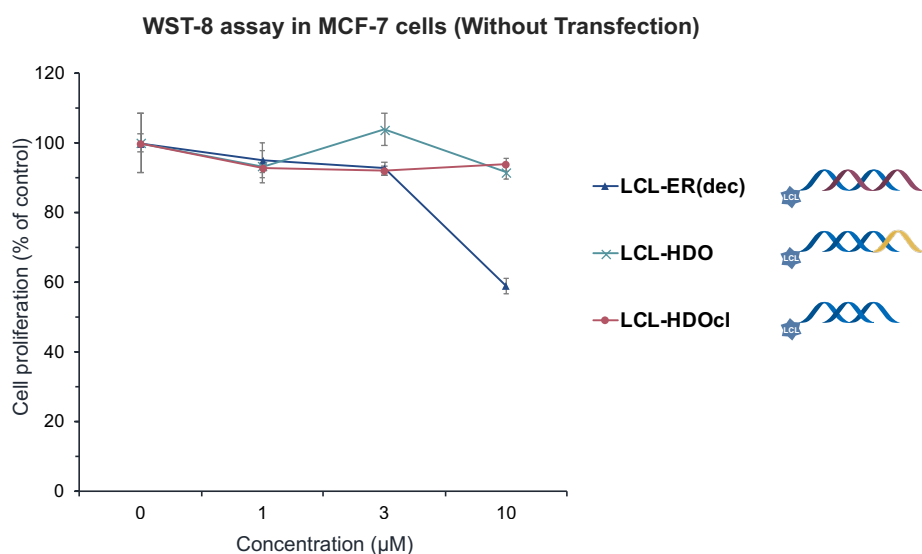

**Figure S8.** Effects of PROTACs on the proliferation of ER $\alpha$ -positive breast cancer cells. Growth inhibition of ER $\alpha$ -positive breast cancer cells by PROTACs. MCF-7 cells were treated with 1–10  $\mu$ M of the indicated PROTACs for 72 h, and cell proliferation was then evaluated using a cell viability assay. All PROTACs were added without transfection reagents. Data represent the mean  $\pm$  standard deviation ( $n = 5$ ).
